# Supplementary material for: Using quantitative magnetic resonance imaging to track cerebral alterations in multiple sclerosis brain: a longitudinal study
Source: bioRxiv or medRxiv preprint supplement (doi:10.1101/2022.01.26.22269806), 2022-09-06
Supplement: Supplementary file [file media-1.pdf]

**Supplementary data 1: Multi-echo 3D FLASH acquisition parameters for Siemens Magnetom PRISMA MRI**

|                                        | <b>PDw</b>        | <b>T1w</b>        | <b>MTw</b>                            |
|----------------------------------------|-------------------|-------------------|---------------------------------------|
| <b>TR [ms]</b>                         | 24.5              | 24.5              | 24.5                                  |
| <b>Flip angle [°]</b>                  | 6                 | 21                | 6                                     |
| <b>Bipolar gradient echoes/TE [ms]</b> | 8/TE 2.34 – 18.72 | 8/TE 2.34 – 18.72 | 6/TE 2.34 – 14.04                     |
| <b>Off-resonance Gaussian MT pulse</b> | N/A               | N/A               | FA: 220°<br>Frequency offset: 2 [kHz] |
| <b>Bandwidth [Hz/Px]</b>               | 465               | 465               | 465                                   |

**Supplementary data 2:** Extended demographic data. Age, disease duration, EDSS and relapses values were taken at baseline.

|                | Age range | Sex | Disease duration | MS type | EDSS | Disease modifying treatment | Total number of relapses at T0 (inclusion) |
|----------------|-----------|-----|------------------|---------|------|-----------------------------|--------------------------------------------|
| <b>sub-001</b> | 36-40     | F   | 0.8              | RRMS    | 2    | First line                  | 1                                          |
| <b>sub-002</b> | 26-30     | F   | 0.7              | RRMS    | 1.5  | Second line                 | 2                                          |
| <b>sub-003</b> | 31-35     | M   | 1.6              | RRMS    | 2    | First line                  | 1                                          |
| <b>sub-004</b> | 26-30     | M   | 1.8              | RRMS    | 3    | Second line                 | 2                                          |
| <b>sub-005</b> | 36-40     | F   | 3.4              | RRMS    | 1    | Second line                 | 1                                          |
| <b>sub-006</b> | 21-25     | M   | 0.3              | RRMS    | 1.5  | First line                  | 1                                          |
| <b>sub-007</b> | 31-35     | F   | 1.6              | RRMS    | 2    | Second line                 | 2                                          |
| <b>sub-008</b> | 61-65     | M   | 16               | PMS     | 4    | None                        | N/A                                        |
| <b>sub-009</b> | 31-35     | M   | 11.4             | RRMS    | 3    | Second line                 | 5                                          |
| <b>sub-010</b> | 31-35     | M   | 10               | PMS     | 6    | None                        | N/A                                        |
| <b>sub-011</b> | 61-65     | M   | 25               | PMS     | 6    | None                        | N/A                                        |
| <b>sub-012</b> | 26-30     | F   | 4                | RRMS    | 1    | First line                  | 1                                          |
| <b>sub-013</b> | 61-65     | F   | 23.7             | PMS     | 5.5  | None                        | N/A                                        |
| <b>sub-014</b> | 51-55     | F   | 28               | RRMS    | 2.5  | First line                  | 4                                          |
| <b>sub-015</b> | 46-50     | M   | 8.9              | PMS     | 4    | Ocrelizumab                 | N/A                                        |
| <b>sub-016</b> | 36-40     | M   | 2                | PMS     | 5    | Ocrelizumab                 | N/A                                        |
| <b>sub-017</b> | 46-50     | M   | 0.5              | RRMS    | 2    | Second line                 | 2                                          |

**Supplementary data 3:** Additional follow-up clinical data for each subject.

|         | <b>Annual relapse rate</b> | <b>IV steroids</b>    | <b>Treatment change</b>                      |
|---------|----------------------------|-----------------------|----------------------------------------------|
| sub-001 | 0                          | None                  | None                                         |
| sub-002 | 0                          | None                  | None                                         |
| sub-003 | 0                          | None                  | None                                         |
| sub-004 | 0                          | None                  | None                                         |
| sub-005 | 0                          | None                  | None                                         |
| sub-006 | 0                          | None                  | None                                         |
| sub-007 | 0                          | None                  | Switch from natalizumab to ocrélizumab       |
| sub-008 | N/A                        | None                  | None                                         |
| sub-009 | 0                          | None                  | Switch from natalizumab to alemtuzumab       |
| sub-010 | N/A                        | None                  | None                                         |
| sub-011 | N/A                        | None                  | None                                         |
| sub-012 | 0                          | None                  | None                                         |
| sub-013 | N/A                        | None                  | None                                         |
| sub-014 | 0.21                       | 1 between T0 and T1/2 | Start Glatiramer acetate after the relapse   |
| sub-015 | N/A                        | None                  | Start ocrélizumab at T1/2                    |
| sub-016 | N/A                        | None                  | Start ocrélizumab at T1/2                    |
| sub-017 | 0.43                       | 2 between T0 and T1   | Start Glatiramer acetate after first relapse |

**Supplementary data 4:** Line plots illustrating individual AROCs for PD (left) and R1 (right) in NAWM. Each line corresponds to one subject. Dotted lines represent increasing rates.

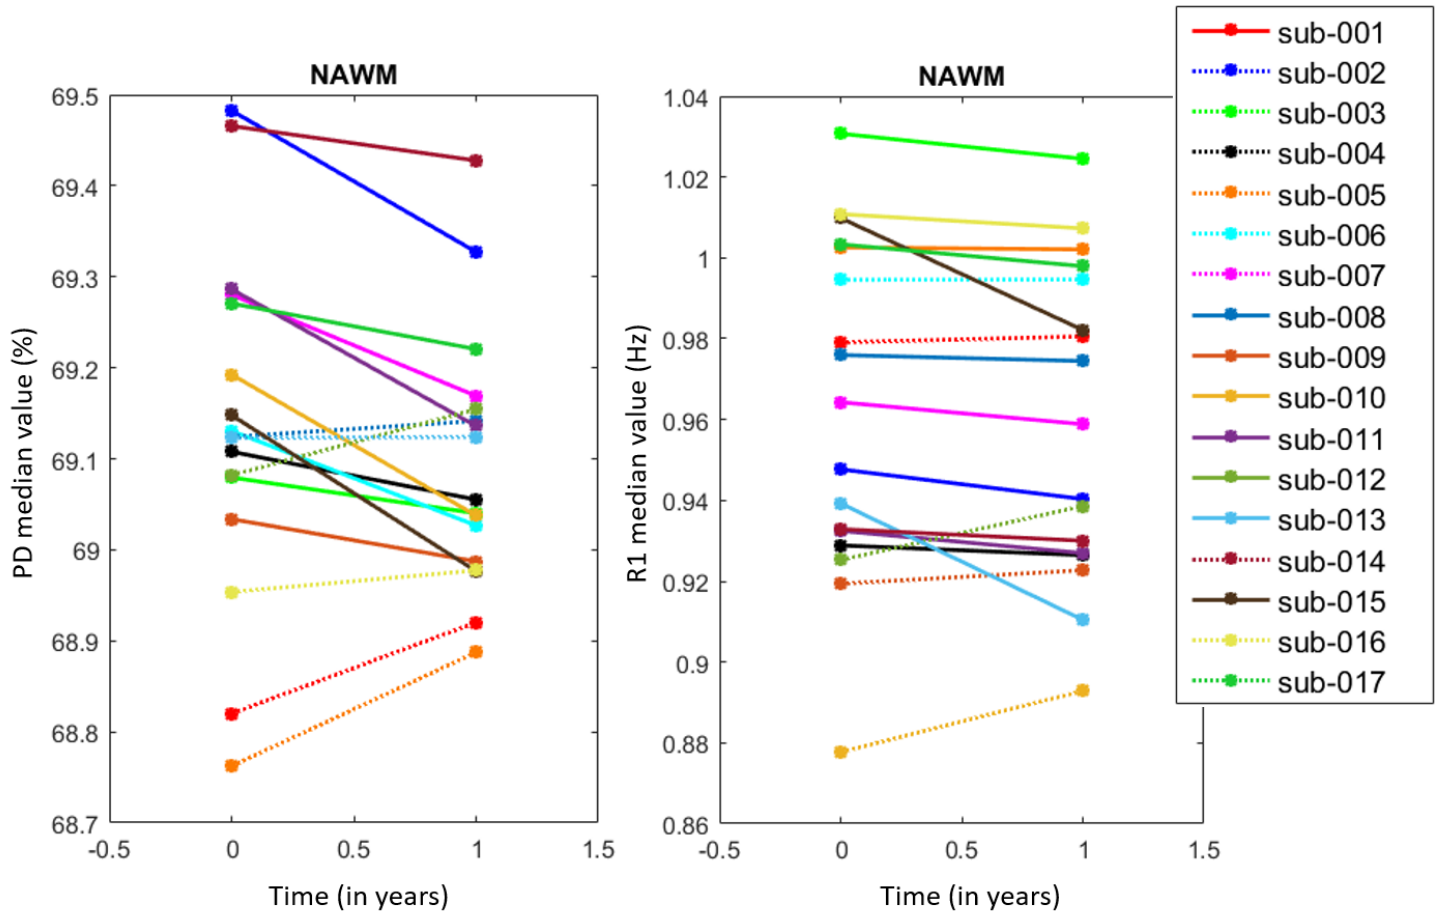

**Supplementary data 5:** Differences of lesion class Least Squares Means. First two columns correspond to tissue class labels (0 = NAWM, 1 = Later peripheral lesion, 2 = Initial peripheral lesion, 3 = FLAIR lesion).

### MTsat

| TISSUE_CLASS | _TISSUE_CLASS | Estimate | Standard Error | DF   | t Value | Pr >  t |
|--------------|---------------|----------|----------------|------|---------|---------|
| 0            | 1             | 0.1761   | 0.06105        | 2956 | 2.88    | .0040   |
| 0            | 2             | 0.4153   | 0.06105        | 2956 | 6.80    | <.0001  |
| 0            | 3             | 0.4914   | 0.06105        | 2956 | 8.05    | <.0001  |
| 1            | 2             | 0.2393   | 0.04084        | 2427 | 5.86    | <.0001  |
| 1            | 3             | 0.3153   | 0.04084        | 2427 | 7.72    | <.0001  |
| 2            | 3             | 0.07604  | 0.04084        | 2427 | 1.86    | .0627   |

### PD

| TISSUE_CLASS | _TISSUE_CLASS | Estimate | Standard Error | DF   | t Value | Pr >  t |
|--------------|---------------|----------|----------------|------|---------|---------|
| 0            | 1             | -0.03620 | 0.008791       | 4040 | -4.12   | <.0001  |
| 0            | 2             | -0.07043 | 0.008791       | 4040 | -8.01   | <.0001  |
| 0            | 3             | -0.09631 | 0.008791       | 4040 | -10.96  | <.0001  |
| 1            | 2             | -0.03422 | 0.005147       | 3395 | -6.65   | <.0001  |
| 1            | 3             | -0.06010 | 0.005147       | 3395 | -11.68  | <.0001  |
| 2            | 3             | -0.02588 | 0.005147       | 3395 | -5.03   | <.0001  |

### R1

| TISSUE_CLASS | _TISSUE_CLASS | Estimate | Standard Error | DF   | t Value | Pr >  t |
|--------------|---------------|----------|----------------|------|---------|---------|
| 0            | 1             | 0.1004   | 0.03359        | 3265 | 2.99    | .0028   |
| 0            | 2             | 0.2187   | 0.03359        | 3265 | 6.51    | <.0001  |
| 0            | 3             | 0.2938   | 0.03359        | 3265 | 8.75    | <.0001  |
| 1            | 2             | 0.1183   | 0.02215        | 2718 | 5.34    | <.0001  |
| 1            | 3             | 0.1934   | 0.02215        | 2718 | 8.73    | <.0001  |
| 2            | 3             | 0.07516  | 0.02215        | 2718 | 3.39    | .0007   |

### R2\*

| TISSUE_CLASS | _TISSUE_CLASS | Estimate | Standard Error | DF   | t Value | Pr >  t |
|--------------|---------------|----------|----------------|------|---------|---------|
| 0            | 1             | 0.1043   | 0.03137        | 3927 | 3.32    | .0009   |
| 0            | 2             | 0.1672   | 0.03137        | 3927 | 5.33    | <.0001  |
| 0            | 3             | 0.2499   | 0.03137        | 3927 | 7.97    | <.0001  |
| 1            | 2             | 0.06288  | 0.01851        | 3236 | 3.40    | .0007   |
| 1            | 3             | 0.1456   | 0.01851        | 3236 | 7.86    | <.0001  |
| 2            | 3             | 0.08273  | 0.01851        | 3236 | 4.47    | <.0001  |
