# Supplementary material for: Using quantitative magnetic resonance imaging to track cerebral alterations in multiple sclerosis brain: a longitudinal study
Source: bioRxiv or medRxiv preprint supplement (doi:10.1101/2022.01.26.22269806), 2022-09-06

**Supplementary data 3:** Line plots illustrating individual ARoC's for PD (left) and R1 (right) in NAWM. Each line corresponds to one subject. Dotted lines represent increasing rates.

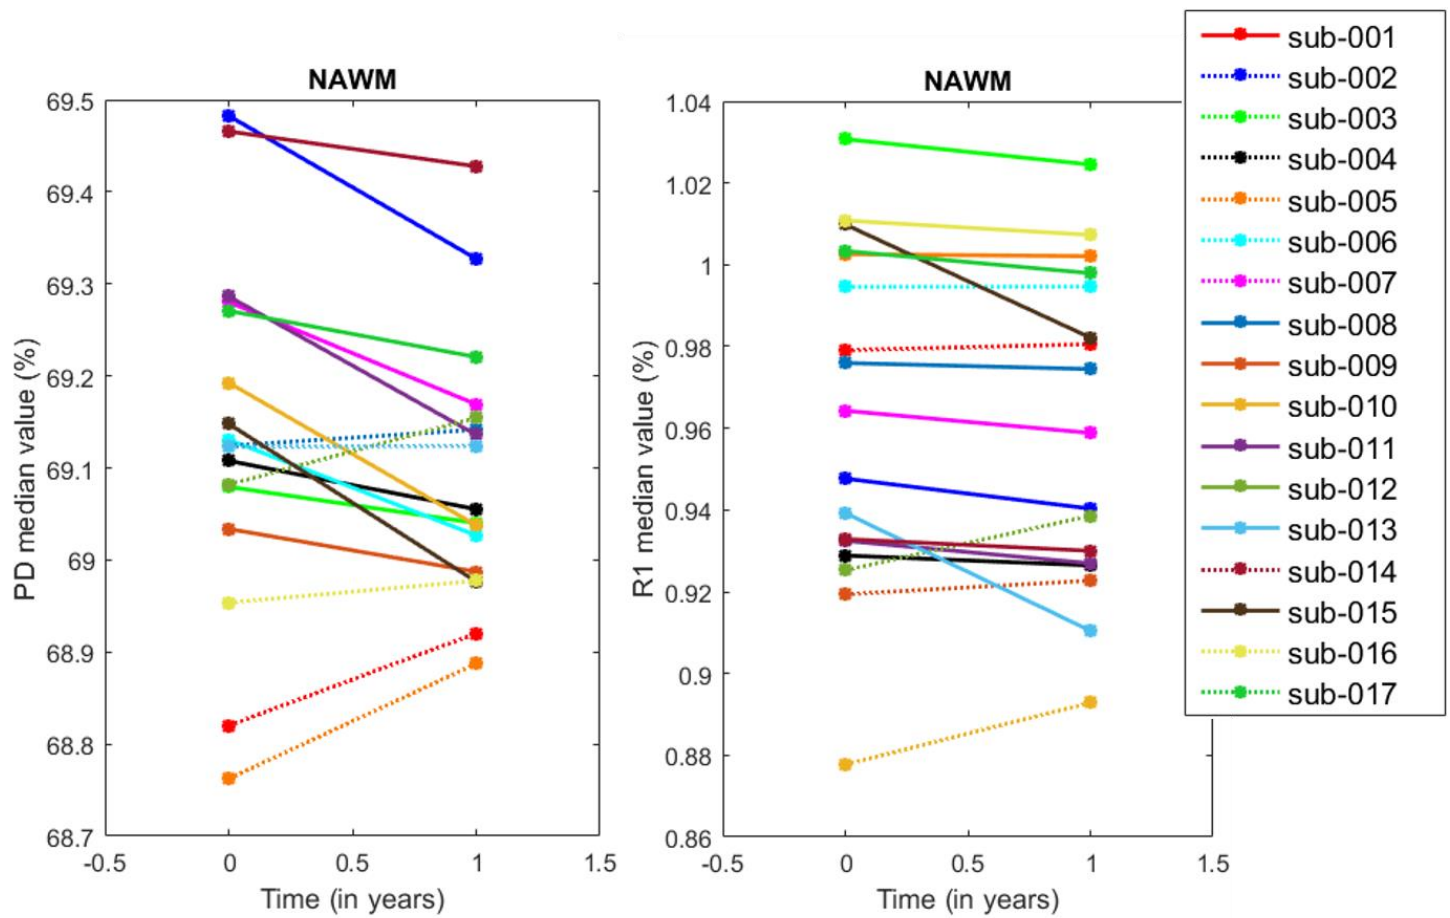

Supplement: Supplementary file [file media-3.pdf]
